# Supplementary material for: Measuring language lateralisation with different language tasks: a systematic review
Source: PeerJ. 2017 Oct 24;5:e3929. doi: 10.7717/peerj.3929 (PMC5659218; doi:10.7717/peerj.3929)
Supplement: Supplemental Information 6 — Spreadsheet with laterality data from studies meeting our criteria for inclusion in forest plots (see ‘Data collection and analysis’). Spreadsheet gives details on methods of LI calculation, LI means, standard deviations and/or standard errors, and 95% confidence intervals, with separate worksheets for each forest plot (Figs. 2–4). [file peerj-05-3929-s006.xlsx]

## Sheet: Fig 2 Verbal fluency
	Author	Region	Method	Task	Baseline	LI	d_SE	ci.low	ci.high	N	Spread	Col12	Col13	group	sub
1	Adcock et al (2003), [N=12]	Frontal	Voxel magnitude	Phonemic_x000D_ fluency	Passive	0.759	0.069282	0.623207	0.894793	12	C.I.	NA	vis	a	NA
2	Ocklenburg et al (2013), [N=29]	Frontal	Voxel count	Phonemic_x000D_ fluency	Passive	0.49	0.0724212	0.348054	0.631946	29	C.I.	NA	aud	a	NA
3	Ocklenburg et al (2013), [N=29]	Frontal	Voxel magnitude	Phonemic_x000D_ fluency	Passive	0.29	0.0724212	0.148054	0.431946	29	C.I.	NA	aud	b	NA
4	*Sanjuan et al (2010), [N=18]	Frontal	Voxel count	Phonemic_x000D_ fluency	Active	0.658	NA	NA	NA	18	Unknown	NA	aud	a	NA
5	Ocklenburg et al (2013), [N=29]	Temporoparietal	Voxel count	Phonemic_x000D_ fluency	Passive	0.51	0.0724212	0.368054	0.651946	29	C.I.	NA	aud	a	NA
6	Ocklenburg et al (2013), [N=29]	Temporoparietal	Voxel magnitude	Phonemic_x000D_ fluency	Passive	0.3	0.0668503	0.168973	0.431027	29	C.I.	NA	aud	b	NA
7	**Adcock et al (2003), [N=12]	Combined_x000D_ frontal_x000D_ and_x000D_ temporoparietal	Voxel count	Phonemic_x000D_ fluency	Passive	0.633	0.0490748	0.536813	0.729187	12	C.I.	NA	aud	a	z=2.3
8	**Adcock et al (2003), [N=12]	Combined_x000D_ frontal_x000D_ and_x000D_ temporoparietal	Voxel count	Phonemic_x000D_ fluency	Passive	0.78	0.046188	0.689471	0.870529	12	C.I.	NA	vis	b	z=5.3
9	Baciu et al (2005), [N=10]	Combined_x000D_ frontal_x000D_ and_x000D_ temporoparietal	Voxel count	Phonemic_x000D_ fluency	Passive	0.935	0.0442719	0.848227	1	10	C.I.	NA	vis	a	NA
10	Backes et al (2005), [N=9]	Combined_x000D_ frontal_x000D_ and_x000D_ temporoparietal	Voxel count	Phonemic_x000D_ fluency	Passive	0.66	0.09	0.4836	0.8364	9	C.I.	NA	vis	a	NA
11	Tailby et al (2014), [N=42]	Combined_x000D_ frontal_x000D_ and_x000D_ temporoparietal	LI ratio	Phonemic_x000D_ fluency	Passive	0.82	0.0246885	0.77161	0.86839	42	C.I.	NA	vis	a	NA
12	*Deblaere et al (2002), [N=9]	Global	Voxel count	Phonemic_x000D_ fluency	Passive	0.67	NA	NA	NA	9	Unknown	NA	vis	a	NA
13	Gaillard et al (2003), [N=22]	Frontal	Voxel count	Semantic_x000D_ fluency	Passive	0.57	0.108732	0.356885	0.783115	22	C.I.	NA	aud	a	NA
14	Partovi et al (2012b), [N=14]	Frontal	Voxel count	Semantic_x000D_ fluency	Passive	0.825	0.0980849	0.632754	1	14	C.I.	NA	vis	a	NA
15	Partovi et al (2012a), [N=14]	Frontal	Voxel count	Semantic_x000D_ fluency	Passive	0.66	0.0988867	0.466182	0.853818	14	C.I.	NA	vis	a	NA
16	Stippich et al (2003), [N=14]	Frontal	Voxel count	Semantic_x000D_ fluency	Passive	0.83	0.0641427	0.70428	0.95572	14	C.I.	NA	vis	a	NA
17	Thivard et al (2005), [N=17]	Frontal	Voxel count	Semantic_x000D_ fluency	Passive	0.51	0.0654846	0.38165	0.63835	17	C.I.	NA	aud	a	NA
18	Gaillard et al (2003), [N=22]	Temporoparietal	Voxel count	Semantic_x000D_ fluency	Passive	0.52	0.0980723	0.327778	0.712222	22	C.I.	NA	aud	a	NA
19	Partovi et al (2012b), [N=14]	Temporoparietal	Voxel count	Semantic_x000D_ fluency	Passive	0.578	0.146192	0.291464	0.864536	14	C.I.	NA	vis	a	NA
20	Partovi et al (2012a), [N=14]	Temporoparietal	Voxel count	Semantic_x000D_ fluency	Passive	0.06	0.17372	-0.280491	0.400491	14	C.I.	NA	vis	a	NA
21	Stippich et al (2003), [N=14]	Temporoparietal	Voxel count	Semantic_x000D_ fluency	Passive	0.76	0.0534522	0.655234	0.864766	14	C.I.	NA	vis	a	NA
22	Thivard et al (2005), [N=17]	Temporoparietal	Voxel count	Semantic_x000D_ fluency	Passive	0.57	0.155223	0.265763	0.874237	17	C.I.	NA	aud	a	NA
23	Krinik et al (2003), [N=6]	Global	Voxel count	Semantic_x000D_ fluency	Passive	0.56	0.0612372	0.439975	0.680025	6	C.I.	NA	aud	a	NA
24	Sanjuan et al (2010), [N=18]	Frontal	Voxel count	Verb_x000D_ generation	Active	0.821	0.0659966	0.691647	0.950353	18	C.I.	NA	aud	a	NA
25	Szaflarski et al (2008), [N=49]	Frontal	Voxel count	Verb_x000D_ generation	Active	0.42	0.0442857	0.3332	0.5068	49	C.I.	NA	aud	a	NA
26	van Oers et al (2010), [N=13]	Frontal	Voxel count	Verb_x000D_ generation	Passive	0.47	0.016641	0.437384	0.502616	13	C.I.	NA	vis	a	NA
27	Vikingstad et al (2000), [N=23]	Frontal	Voxel count	Verb_x000D_ generation	Passive	0.58	0.0750652	0.432872	0.727128	23	C.I.	NA	vis	a	NA
28	Szaflarski et al (2008), [N=49]	Temporoparietal	Voxel count	Verb_x000D_ generation	Active	0.11	0.0628571	-0.0132	0.2332	49	C.I.	NA	aud	a	NA
29	van Oers et al (2010), [N=13]	Temporoparietal	Voxel count	Verb_x000D_ generation	Passive	0.41	0.022188	0.366512	0.453488	13	C.I.	NA	vis	a	NA
30	*Vikingstad et al (2000), [N=23]	Temporoparietal	Voxel count	Verb_x000D_ generation	Passive	0.48	NA	NA	NA	23	Unknown	NA	vis	a	NA
31	Dodoo-Schittko et al (2012), [N=11]	Combined_x000D_ frontal_x000D_ and_x000D_ temporoparietal	Voxel count	Verb_x000D_ generation	Passive	0.445	0.078996	0.290168	0.599832	11	C.I.	NA	vis	a	NA
32	Dodoo-Schittko et al (2012), [N=11]	Combined_x000D_ frontal_x000D_ and_x000D_ temporoparietal	Voxel count	Verb_x000D_ generation	Active	0.678	0.0889458	0.503666	0.852334	11	C.I.	NA	vis	b	NA
33	Pravata et al (2011), [N=12]	Combined_x000D_ frontal_x000D_ and_x000D_ temporoparietal	Voxel count	Verb_x000D_ generation	Passive	0.7	0.069282	0.564207	0.835793	12	C.I.	NA	vis	a	NA
34	Sveller et al (2006), [N=63]	Combined_x000D_ frontal_x000D_ and_x000D_ temporoparietal	Voxel count	Verb_x000D_ generation	Passive	0.57	0.042836	0.486041	0.653959	63	C.I.	NA	vis	a	NA
35	Szaflarski et al (2008), [N=49]	Combined_x000D_ frontal_x000D_ and_x000D_ temporoparietal	Voxel count	Verb_x000D_ generation	Active	0.35	0.0414286	0.2688	0.4312	49	C.I.	NA	aud	a	NA
36	Tailby et al (2014), [N=42]	Combined_x000D_ frontal_x000D_ and_x000D_ temporoparietal	LI ratio	Verb_x000D_ generation	Passive	0.78	0.0401189	0.701367	0.858633	42	C.I.	NA	vis	a	NA
37	van Oers et al (2010), [N=13]	Combined_x000D_ frontal_x000D_ and_x000D_ temporoparietal	Voxel count	Verb_x000D_ generation	Passive	0.44	0.016641	0.407384	0.472616	13	C.I.	NA	vis	a	NA
38	Pravata et al (2011), [N=12]	Global	Voxel count	Verb_x000D_ generation	Passive	0.43	0.057735	0.316839	0.543161	12	C.I.	NA	vis	a	NA
39	Suarez et al (2007), [N=13]	Frontal	t-weighted	Antonym_x000D_ generation_x000D_ (visual)	Passive	0.29	0.0360555	0.219331	0.360669	13	C.I.	NA	vis	a	NA
40	Suarez et al (2007), [N=13]	Frontal	t-weighted	Antonym_x000D_ generation_x000D_ (auditory)	Passive	0.23	0.0360555	0.159331	0.300669	13	C.I.	NA	aud	b	NA
41	Tie et al (2009), [N=6]	Frontal	Voxel count	Antonym_x000D_ generation_x000D_ (visual)	Passive	0.83	0.151052	0.533938	1	6	C.I.	NA	vis	a	NA
42	Suarez et al (2007), [N=13]	Temporoparietal	t-weighted	Antonym_x000D_ generation_x000D_ (visual)	Passive	0.05	0.099846	-0.145698	0.245698	13	C.I.	NA	vis	a	NA
43	Suarez et al (2007), [N=13]	Temporoparietal	t-weighted	Antonym_x000D_ generation_x000D_ (auditory)	Passive	0.06	0.0582435	-0.0541573	0.174157	13	C.I.	NA	aud	b	NA
44	Tie et al (2009), [N=6]	Temporoparietal	Voxel count	Antonym_x000D_ generation_x000D_ (visual)	Passive	0.16	0.228619	-0.288093	0.608093	6	C.I.	NA	vis	a	NA
45	Dodoo-Schittko et al (2012), [N=11]	Combined_x000D_ frontal_x000D_ and_x000D_ temporoparietal	Voxel count	Antonym_x000D_ generation_x000D_ (visual)	Passive	0.453	0.080202	0.295804	0.610196	11	C.I.	NA	vis	a	NA
46	Suarez et al (2007), [N=13]	Global	t-weighted	Antonym_x000D_ generation_x000D_ (visual)	Passive	0.07	0.0305085	0.0102033	0.129797	13	C.I.	NA	vis	a	NA
47	Suarez et al (2007), [N=13]	Global	t-weighted	Antonym_x000D_ generation_x000D_ (auditory)	Passive	0.09	0.022188	0.0465115	0.133488	13	C.I.	NA	aud	b	NA

## Sheet: Fig 3 PJ N SG SC
	Author	Region	Method	Task	Baseline	LI	d_SE	ci.low	ci.high	N	Spread	group	sub
1	Clements et al (2006), [N=15]	Frontal	Voxel count	Phonemic_x000D_ judgement	Active	0.89	0.16	0.5764	1	15	C.I.	a	NA
2	Clements et al (2006), [N=15]	Frontal	Voxel count	Phonemic_x000D_ judgement	Active	0.66	0.4	-0.124	1	15	C.I.	b	NA
3	Niskanen et al (2012), [N=20]	Frontal	Voxel count	Phonemic_x000D_ judgement	Active	0.66	0.149817	0.36636	0.95364	20	C.I.	a	NA
4	Clements et al (2006), [N=15]	Temporoparietal	Voxel count	Phonemic_x000D_ judgement	Active	0.41	0.63	-0.8248	1	15	C.I.	a	NA
5	Clements et al (2006), [N=15]	Temporoparietal	Voxel count	Phonemic_x000D_ judgement	Active	0.5	0.56	-0.5976	1	15	C.I.	b	NA
6	Niskanen et al (2012), [N=20]	Temporoparietal	Voxel count	Phonemic_x000D_ judgement	Active	0.54	0.12522	0.294569	0.785431	20	C.I.	a	NA
7	Baciu et al (2005), [N=10]	Combined_x000D_ frontal_x000D_ and_x000D_ temporoparietal	Flip method	Phonemic_x000D_ judgement	Active	0.844	0.0885438	0.670454	1	10	C.I.	a	NA
8	Baciu et al (2005), [N=10]	Combined_x000D_ frontal_x000D_ and_x000D_ temporoparietal	Voxel count	Phonemic_x000D_ judgement	Active	0.745	0.0885438	0.571454	0.918546	10	C.I.	b	NA
9	Niskanen et al (2012), [N=20]	Combined_x000D_ frontal_x000D_ and_x000D_ temporoparietal	Voxel count	Phonemic_x000D_ judgement	Active	0.65	0.118512	0.417717	0.882283	20	C.I.	a	NA
10	Seghier et al (2004), [N=26]	Global	Voxel count	Phonemic_x000D_ judgement	Active	0.66	0.0529514	0.556215	0.763785	26	C.I.	a	NA
11	*Brennan et al (2007), [N=7]	Frontal	LI ratio	Picture_x000D_ naming	Active	0.35	NA	NA	NA	7	Unknown	a	NA
12	Van Oers et al (2010), [N=13]	Frontal	Voxel count	Picture_x000D_ naming	Active	0.47	0.022188	0.426512	0.513488	13	C.I.	a	NA
13	*Vikingstad et al (2000), [N=23]	Frontal	Voxel count	Picture_x000D_ naming	Passive	0.51	NA	NA	NA	23	Unknown	a	NA
14	*Brennan et al (2007), [N=7]	Temporoparietal	LI ratio	Picture_x000D_ naming	Active	0.76	NA	NA	NA	7	Unknown	a	NA
15	Van Oers et al (2010), [N=13]	Temporoparietal	Voxel count	Picture_x000D_ naming	Active	0.48	0.033282	0.414767	0.545233	13	C.I.	a	NA
16	Vikingstad et al (2000), [N=23]	Temporoparietal	Voxel count	Picture_x000D_ naming	Passive	0.45	0.110513	0.233395	0.666605	23	C.I.	a	NA
17	Van Oers et al (2010), [N=13]	Combined_x000D_ frontal_x000D_ and_x000D_ temporoparietal	Voxel count	Picture_x000D_ naming	Active	0.47	0.022188	0.426512	0.513488	13	C.I.	a	NA
18	*Deblaere et al (2002), [N=9]	Global	Voxel count	Picture_x000D_ naming	Active	0.08	NA	NA	NA	9	Unknown	a	NA
19	**Gaillard et al (2002), [N=22]	Frontal	Voxel count	Responsive_x000D_ naming	Passive	0.65	0.0703562	0.512102	0.787898	22	C.I.	a	t=3
20	**Gaillard et al (2002), [N=22]	Frontal	Voxel count	Responsive_x000D_ naming	Passive	0.83	0.0575642	0.717174	0.942826	22	C.I.	b	t=4
21	**Gaillard et al (2002), [N=22]	Frontal	Voxel count	Responsive_x000D_ naming	Passive	0.98	0.0213201	0.938213	1	22	C.I.	c	t=5
22	Niskanen et al (2012), [N=20]	Frontal	Voxel count	Responsive_x000D_ naming	Passive	0.96	0.0424853	0.876729	1	20	C.I.	a	NA
23	**Gaillard et al (2002), [N=22]	Temporoparietal	Voxel count	Responsive_x000D_ naming	Passive	0.67	0.0469042	0.578068	0.761932	22	C.I.	a	t=3
24	**Gaillard et al (2002), [N=22]	Temporoparietal	Voxel count	Responsive_x000D_ naming	Passive	0.8	0.0511682	0.69971	0.90029	22	C.I.	b	t=4
25	**Gaillard et al (2002), [N=22]	Temporoparietal	Voxel count	Responsive_x000D_ naming	Passive	0.8	0.0575642	0.687174	0.912826	22	C.I.	c	t=5
26	Niskanen et al (2012), [N=20]	Temporoparietal	Voxel count	Responsive_x000D_ naming	Passive	0.93	0.0715542	0.789754	1	20	C.I.	a	NA
27	Niskanen et al (2012), [N=20]	Combined_x000D_ frontal_x000D_ and_x000D_ temporoparietal	Voxel count	Responsive_x000D_ naming	Passive	0.94	0.0581378	0.82605	1	20	C.I.	a	NA
28	Partovi et al (2012b), [N=14]	Frontal	Voxel count	Sentence_x000D_ generation	Passive	0.64	0.116526	0.411609	0.868391	14	C.I.	a	NA
29	Partovi et al (2012a), [N=14]	Frontal	Voxel count	Sentence_x000D_ generation	Passive	0.24	0.216482	-0.184304	0.664304	14	C.I.	a	NA
30	Stippich et al (2003), [N=14]	Frontal	Voxel count	Sentence_x000D_ generation	Passive	0.89	0.0534522	0.785234	0.994766	14	C.I.	a	NA
31	Partovi et al (2012b), [N=14]	Temporoparietal	Voxel count	Sentence_x000D_ generation	Passive	0.65	0.191626	0.274412	1	14	C.I.	a	NA
32	Partovi et al (2012a), [N=14]	Temporoparietal	Voxel count	Sentence_x000D_ generation	Passive	-0.06	0.203119	-0.458112	0.338112	14	C.I.	a	NA
33	Stippich et al (2003), [N=14]	Temporoparietal	Voxel count	Sentence_x000D_ generation	Passive	0.85	0.0400892	0.771425	0.928575	14	C.I.	a	NA
34	Niskanen et al (2012), [N=20]	Frontal	Voxel count	Sentence_x000D_ comprehension	Active	0.88	0.0804984	0.722223	1	20	C.I.	a	NA
35	Sanjuan et al (2010), [N=22]	Frontal	Voxel count	Sentence_x000D_ comprehension	Active	0.55	0.0746203	0.403744	0.696256	22	C.I.	a	NA
36	Niskanen et al (2012), [N=20]	Temporoparietal	Voxel count	Sentence_x000D_ comprehension	Active	0.69	0.109567	0.475248	0.904752	20	C.I.	a	NA
37	Sanjuan et al (2010), [N=22]	Temporoparietal	Voxel count	Sentence_x000D_ comprehension	Active	0.69	0.0469042	0.598068	0.781932	22	C.I.	a	NA
38	Niskanen et al (2012), [N=20]	Combined_x000D_ frontal_x000D_ and_x000D_ temporoparietal	Voxel count	Sentence_x000D_ comprehension	Active	0.69	0.109567	0.475248	0.904752	20	C.I.	a	NA
39	Kennan et al (2002), [N=6]	Global	Voxel count	Sentence_x000D_ comprehension	Active	0.58	0.11431	0.355953	0.804047	6	C.I.	a	NA
40	Vassal et al (2016), [N=20]	Global	Voxel count	Sentence_x000D_ comprehension	Active	0.71	0.0559017	0.600433	0.819567	20	C.I.	a	NA

## Sheet: Fig 4 SD SL TR
	Author	Region	Method	Task	Baseline	LI	d_SE	ci.low	ci.high	N	Spread	group	sub
1	Fernandez et al (2001), [N=12]	Frontal	t-weighted	Semantic_x000D_ relatedness_x000D_ decision_x000D_ (visual)	Active	0.73	0.0894893	0.554601	0.905399	12	C.I.	a	NA
2	Fernandez et al (2001), [N=12]	Temporoparietal	t-weighted	Semantic_x000D_ relatedness_x000D_ decision_x000D_ (visual)	Active	0.83	0.0635085	0.705523	0.954477	12	C.I.	a	NA
3	Seghier et al (2004), [N=26]	Global	Voxel count	Semantic_x000D_ relatedness_x000D_ decision_x000D_ (visual)	Active	0.76	0.0372621	0.686966	0.833034	26	C.I.	a	NA
4	Hund-Georgiadis et al (2001), [N=14]	Frontal	Voxel count	Category_x000D_ membership_x000D_ decision_x000D_ (visual)	Passive	0.028	0.096214	-0.16058	0.21658	14	C.I.	a	NA
5	Hund-Georgiadis et al (2001), [N=14]	Frontal	Voxel count	Category_x000D_ membership_x000D_ decision_x000D_ (visual)	Active	0.5	0.104232	0.295706	0.704294	14	C.I.	b	NA
6	Hund-Georgiadis et al (2001), [N=14]	Frontal	Voxel count	Category_x000D_ membership_x000D_ decision_x000D_ (auditory)	Active	0.41	0.106904	0.200467	0.619533	14	C.I.	a	NA
7	Szaflarski et al (2008), [N=49]	Frontal	Voxel count	Category_x000D_ membership_x000D_ decision_x000D_ (auditory)	Active	0.54	0.0514286	0.4392	0.6408	49	C.I.	a	NA
8	van Oers et al (2010), [N=13]	Frontal	Voxel count	Category_x000D_ membership_x000D_ decision_x000D_ (visual)	Active	0.43	0.0194145	0.391948	0.468052	13	C.I.	a	NA
9	Hund-Georgiadis et al (2002), [N=17]	Temporoparietal	Voxel count	Category_x000D_ membership_x000D_ decision_x000D_ (visual)	Active	0.49	0.0485071	0.394926	0.585074	17	C.I.	a	NA
10	Szaflarski et al (2008), [N=49]	Temporoparietal	Voxel count	Category_x000D_ membership_x000D_ decision_x000D_ (auditory)	Active	0.36	0.0514286	0.2592	0.4608	49	C.I.	a	NA
11	van Oers et al (2010), [N=13]	Temporoparietal	Voxel count	Category_x000D_ membership_x000D_ decision_x000D_ (visual)	Active	0.38	0.038829	0.303895	0.456105	13	C.I.	a	NA
12	Szaflarski et al (2008), [N=49]	Combined_x000D_ frontal_x000D_ and_x000D_ temporoparietal	Voxel count	Category_x000D_ membership_x000D_ decision_x000D_ (auditory)	Active	0.49	0.0428571	0.406	0.574	49	C.I.	a	NA
13	van Oers et al (2010), [N=13]	Combined_x000D_ frontal_x000D_ and_x000D_ temporoparietal	Voxel count	Category_x000D_ membership_x000D_ decision_x000D_ (visual)	Active	0.43	0.016641	0.397384	0.462616	13	C.I.	a	NA
14	Binder et al (2008), [N=26]	Global	Voxel count	Category_x000D_ membership_x000D_ decision_x000D_ (auditory)	Passive	0.117	0.0617766	-0.0040821	0.238082	26	C.I.	c	NA
15	Binder et al (2008), [N=26]	Global	Voxel count	Category_x000D_ membership_x000D_ decision_x000D_ (auditory)	Active	0.624	0.0327514	0.559807	0.688193	26	C.I.	a	NA
16	Binder et al (2008), [N=26]	Global	Voxel count	Category_x000D_ membership_x000D_ decision_x000D_ (auditory)	Active	0.62	0.0384388	0.54466	0.69534	26	C.I.	b	NA
17	*Deblaere et al (2002), [N=9]	Global	Voxel count	Category_x000D_ membership_x000D_ decision_x000D_ (visual)	Active	0.32	NA	NA	NA	9	Unknown	a	NA
18	Hund-Georgiadis et al (2002), [N=17]	Global	Voxel count	Category_x000D_ membership_x000D_ decision_x000D_ (visual)	Active	0.52	0.0824621	0.358374	0.681626	17	C.I.	a	NA
19	Ocklenburg et al (2013), [N=29]	Frontal	Voxel count	Passive_x000D_ speech_x000D_ listening	Passive	0.19	0.0519947	0.0880904	0.29191	29	C.I.	a	NA
20	Ocklenburg et al (2013), [N=29]	Frontal	Voxel magnitude	Passive_x000D_ speech_x000D_ listening	Passive	0.2	0.0724212	0.0580545	0.341946	29	C.I.	b	NA
21	Thivard et al (2005), [N=17]	Frontal	Voxel count	Passive_x000D_ speech_x000D_ listening	Passive	0.72	0.101865	0.520345	0.919655	17	C.I.	a	NA
22	Miro et al (2014), [N=19]	Temporoparietal	Bootstrapping	Passive_x000D_ speech_x000D_ listening	Passive	0.03	0.0780013	-0.122883	0.182883	19	C.I.	a	NA
23	Ocklenburg et al (2013), [N=29]	Temporoparietal	Voxel count	Passive_x000D_ speech_x000D_ listening	Passive	-0.03	0.0427099	-0.113711	0.0537115	29	C.I.	a	NA
24	Ocklenburg et al (2013), [N=29]	Temporoparietal	Voxel magnitude	Passive_x000D_ speech_x000D_ listening	Passive	-0.06	0.0464238	-0.150991	0.0309907	29	C.I.	b	NA
25	Thivard et al (2005), [N=17]	Temporoparietal	Voxel count	Passive_x000D_ speech_x000D_ listening	Passive	0.43	0.0994396	0.235098	0.624902	17	C.I.	a	NA
26	Binder et al (2008), [N=26]	Global	Voxel count	Passive_x000D_ speech_x000D_ listening	Passive	0.1	0.0823688	-0.0614428	0.261443	26	C.I.	a	NA
27	Binder et al (2008), [N=26]	Global	Voxel count	Passive_x000D_ speech_x000D_ listening	Passive	0.52	0.0902134	0.343182	0.696818	26	C.I.	b	NA
28	Backes et al (2005), [N=9]	Combined_x000D_ frontal_x000D_ and_x000D_ temporoparietal	Voxel count	Text_x000D_ reading	Active	0.59	0.04	0.5116	0.6684	9	C.I.	a	NA
29	*Deblaere et al (2002), [N=9]	Global	Voxel count	Text_x000D_ reading	Active	0.21	NA	NA	NA	9	Unknown	a	NA
